# Supplementary material for: Faceting preferences for AuN and PdN nanoclusters with high-symmetry motifs
Source: Royal Society of Chemistry journal article supplement (doi:10.1039/c3cp50978h), 2013-01-01
Supplement: c3cp50978h.pdf [file c3cp50978h.pdf]

SUPPORTING INFORMATION:

FACETING PREFERENCES FOR  $\text{Au}_N$  AND  $\text{Pd}_N$   
NANOCLUSTERS WITH HIGH-SYMMETRY MOTIFS

A. J. LOGSDAIL, Z. Y. LI AND R. L. JOHNSTON

### 1.1 Plot of Gupta Potential and Cutoff

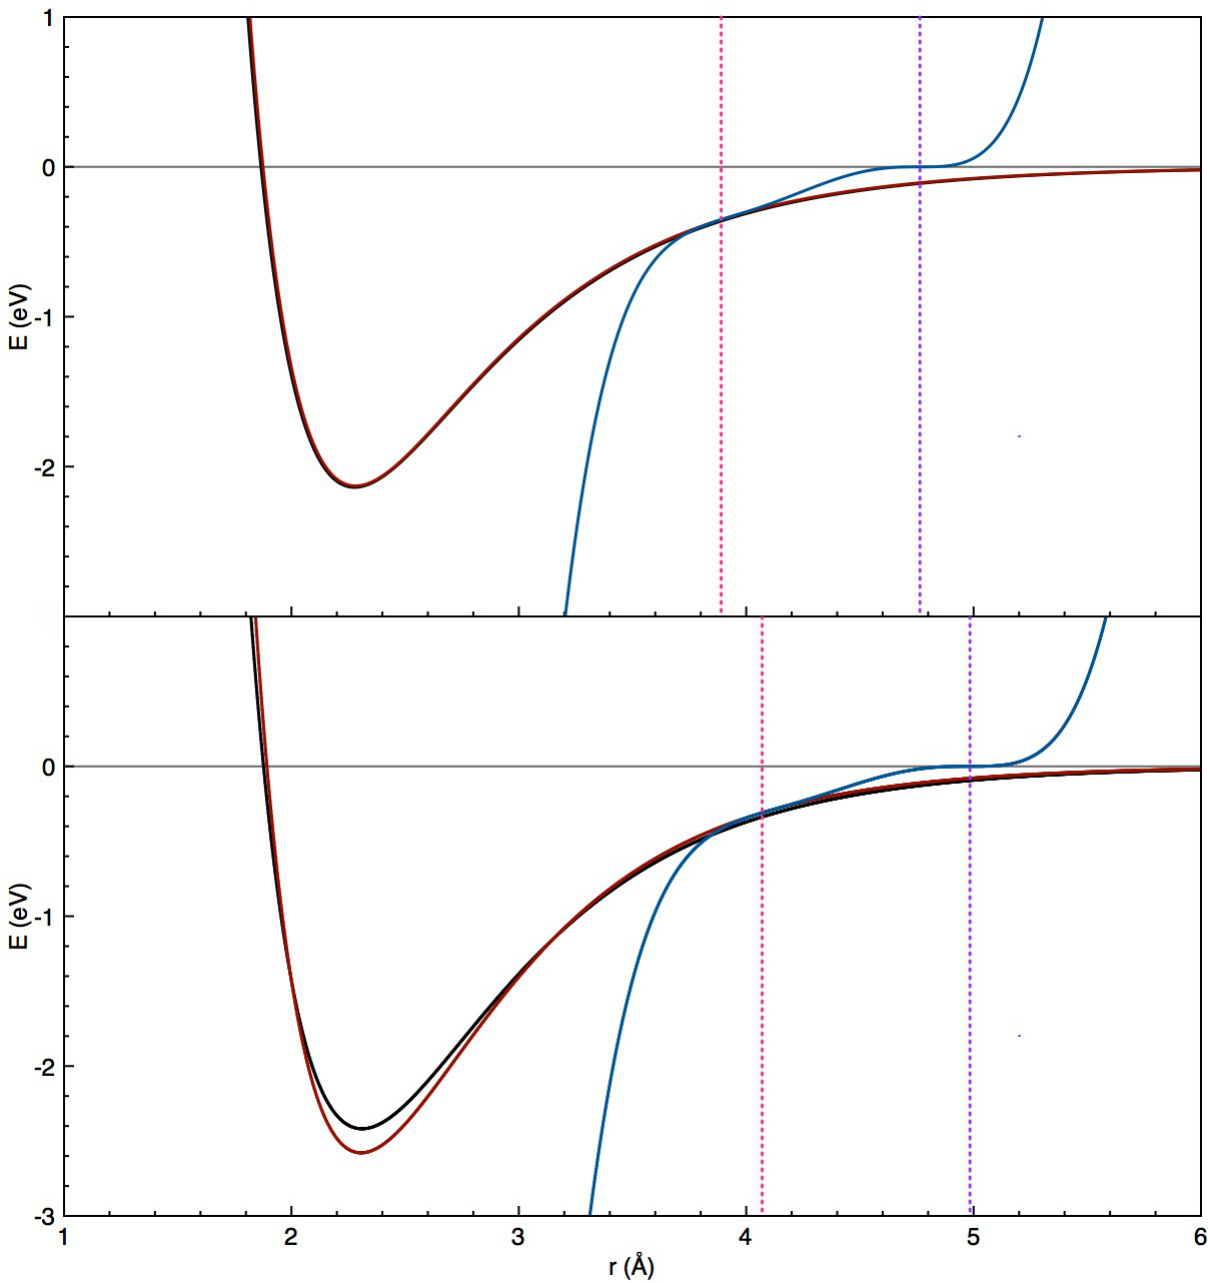

Figure 1.1: Plot of the Gupta Potential function, with different parameters and cutoff in each graph for (a) Pd and (b) Au. Black lines represent the parameters of Cleri and Rosato [1], red lines represent the parameters of Baletto et al. [2], and the blue lines show the polynomial cutoff, with  $C_s$  and  $C_e$  shown by pink and purple dashed lines, respectively.

## 1.2 Long Range Cut-off in the Gupta Potential

The parameters used in reference [2] incorporate a long distance cut-off into the potential for atoms further than second neighbours distance away ( $> \sqrt{2}r$ ) [3]. The interatomic potential decays with increasing distance and introducing a cut-off speeds up the energy calculations for large clusters.

A 5<sup>th</sup> order polynomial was introduced, matching that of Baletto *et al.* [2]. For this, a polynomial replacement for the potential that matches the potential function at the cut-off start ( $C_s$ ), and is zero at the cut-off end ( $C_e$ ) is derived. The replacement is applied separately to each exponential component of the Gupta potential. Considering the term:

$$V_{ij}^r(r_{ij}) = Ae^{-p(\frac{r_{ij}}{r_0}-1)} \quad (1.1)$$

for  $C_s \leq r_{ij} \leq C_e$  we replace the above expression by the following polynomial  $p_1(r_{ij})$ :

$$V_{ij}^r(r_{ij}) = p_1(r_{ij}) = a_5(r_{ij} - C_e)^5 + a_4(r_{ij} - C_e)^4 + a_3(r_{ij} - C_e)^3 \quad (1.2)$$

where the coefficients  $a_5$ ,  $a_4$ ,  $a_3$  are chosen to match the function and its first and second derivatives for  $r_{ij} = C_s$ . For  $r = C_e$ ,  $p_1(r_{ij}) = 0$ . The form of the polynomial ensures that the conditions on the function and its first derivative are automatically matched for  $r_{ij} = C_e$ . In the same way, for the term:

$$[V_{ij}^m(r_{ij})]^{\frac{1}{2}} = \zeta e^{-q(\frac{r_{ij}}{r_0}-1)} \quad (1.3)$$

the following polynomial,  $p_2(r_{ij})$ , is used:

$$[V_{ij}^m(r_{ij})]^{\frac{1}{2}} = p_2(r_{ij}) = x_5(r_{ij} - C_e)^5 + x_4(r_{ij} - C_e)^4 + x_3(r_{ij} - C_e)^3 \quad (1.4)$$

where the coefficients  $x_5$ ,  $x_4$ ,  $x_3$  are calculated to match the form of the Gupta function. The cut-off parameters used are given in Table 1.1, and included in the potential functions plotted in Appendix 1.1.

Table 1.1: Cut-offs and polynomial coefficients used for Au and Pd (to 4 significant figures) for parameter set *II*

|           | Parameter Set <i>II</i> |                         |
|-----------|-------------------------|-------------------------|
|           | Pd                      | Au                      |
| $C_s$ (Å) | 3.890                   | 4.070                   |
| $C_e$ (Å) | 4.764                   | 4.984                   |
| $a_3$     | $-5.732 \times 10^{-3}$ | $-8.105 \times 10^{-3}$ |
| $a_4$     | $-8.477 \times 10^{-3}$ | $-1.110 \times 10^{-2}$ |
| $a_5$     | $-5.723 \times 10^{-3}$ | $-6.828 \times 10^{-3}$ |
| $x_3$     | -3.131                  | -2.232                  |
| $x_4$     | -4.861                  | -3.258                  |
| $x_5$     | -2.157                  | -1.383                  |

## 1.3 Energetic Analysis

### 1.3.1 $\text{Pd}_N$ Clusters

12-Vertex Structures: Icosahedra, Ino-Decahedra and Cuboctahedra.

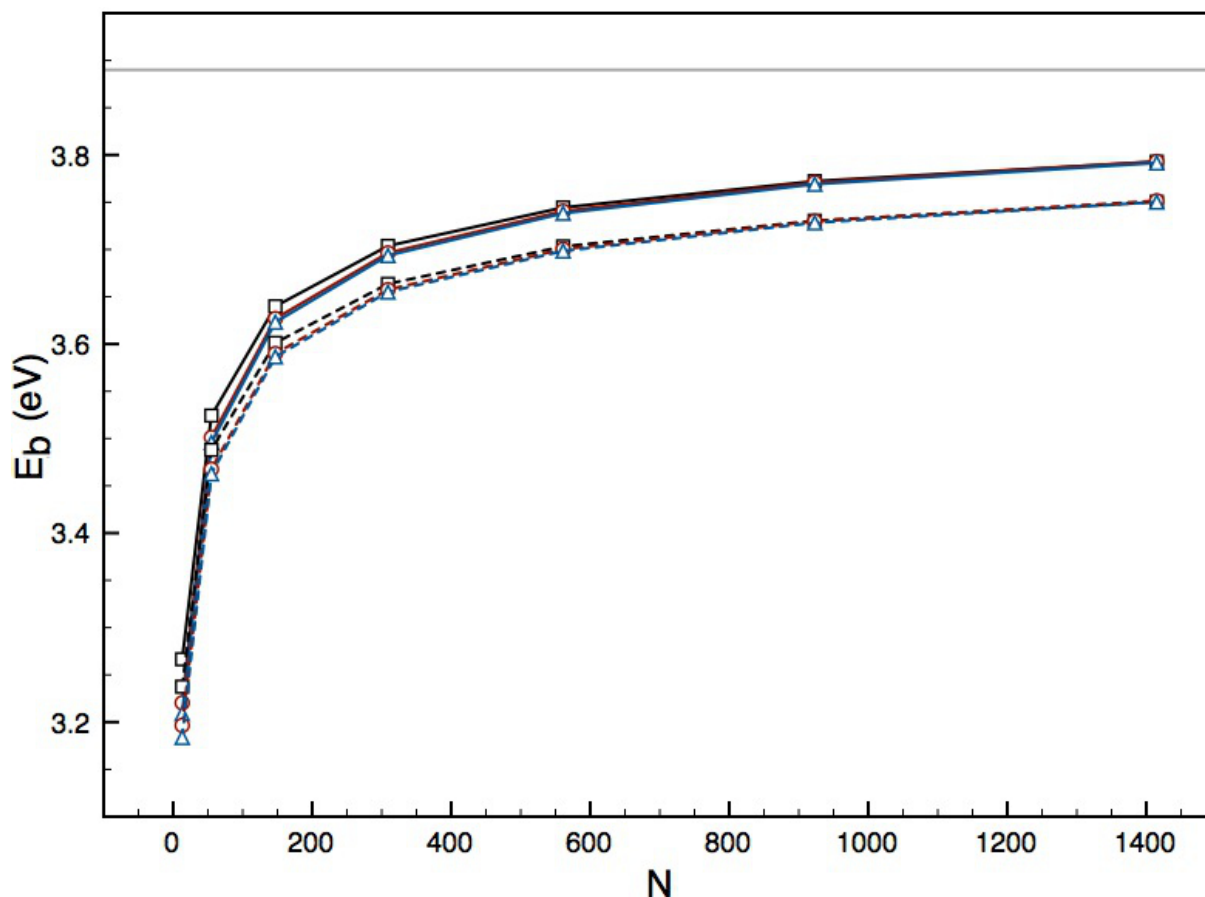

Figure 1.2: Plot of  $E_b$  for  $\text{Pd}_N$  structures against  $N$ . Solid lines represent the parameter set *I* of Cleri and Rosato [1], and dashed lines represent the parameter set *II* of Baletto *et al.* [2]. Ih (black squares), I-Dh (red circles) and CO (blue triangles) are shown in both plots;  $E_{coh}$  of 3.89 eV [4]) is displayed as a grey solid line.

Figure 1.2 plots  $E_b$  for Ih, I-Dh and CO structures, with increasing shell sizes  $k$ , against  $N$ . For  $N < 100$ ,  $E_b$  rapidly increases, before levelling off as  $N > 500$ ; this trend is consistent for both parameter sets. Identification between the different structural motifs is energetically difficult, implying that they are all closely competitive in energy at

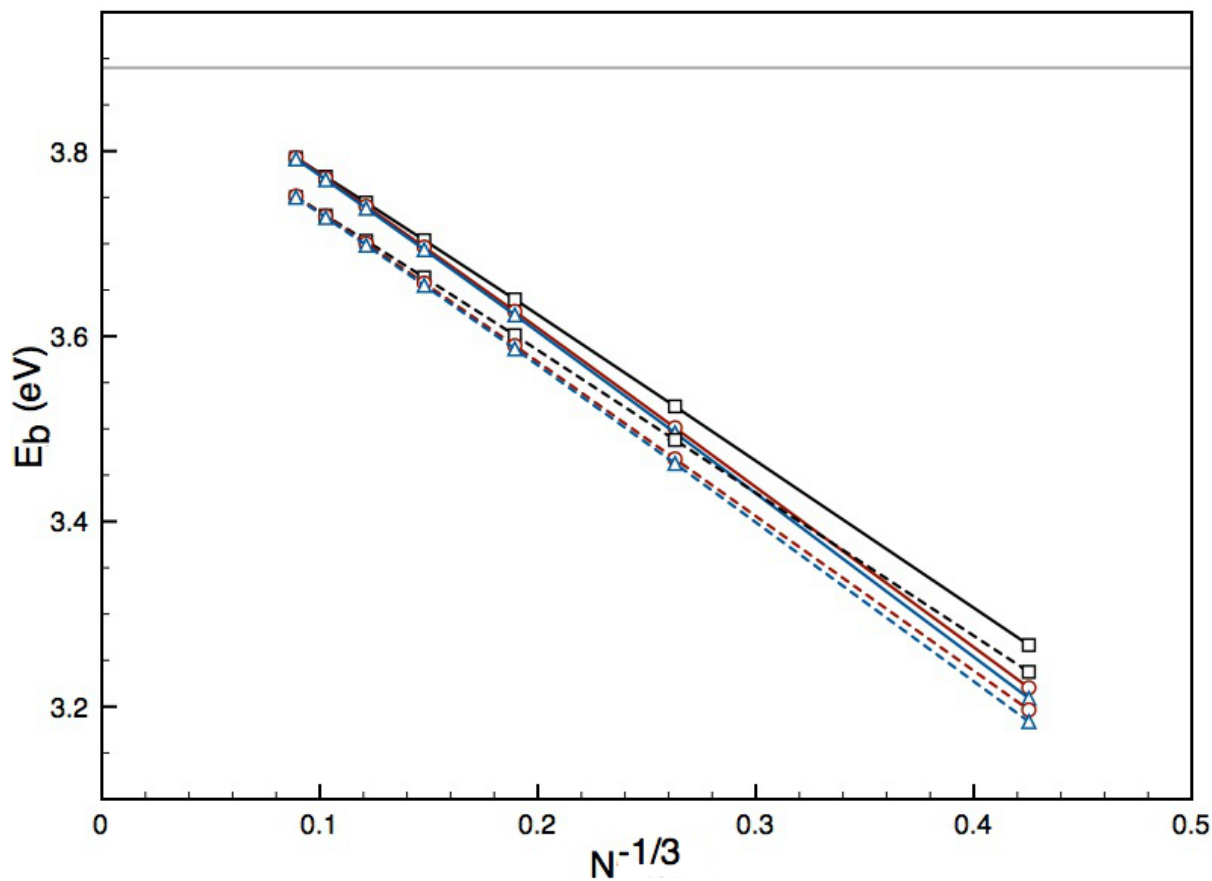

Figure 1.3: Plot of  $E_b$  for  $Pd_N$  structures against  $N^{-\frac{1}{3}}$ . Solid lines represent the parameter set *I* of Cleri and Rosato [1], and dashed lines represent the parameter set *II* of Baletto *et al.* [2]. Ih (black squares), I-Dh (red circles) and CO (blue triangles) are shown in both plots;  $E_{coh}$  of 3.89 eV [4]) is displayed as a grey solid line.

this size. A spacing between trend lines is visible for the two parameter sets: parameter set *I* rises to a higher level than parameter set *II*, before flattening out asymptotically relative to  $E_{coh}$ . The difference in gradients between parameter sets *I* and *II* can be identified in Figure 1.3 where an approximation to the  $E_{coh}$  is achieved for  $N^{-\frac{1}{3}} \rightarrow 0$  when  $N^{-\frac{1}{3}}$  is plotted against  $E_b$ . Linear extrapolation to 0 for parameter set *I* gives a slightly over-exaggerated  $E_{coh}$  (3.92 eV) compared to the experimentally measured value (3.89 eV [4]), whilst parameter set *II* offers better agreement to this measurement (3.88 eV).

### 1.3.2 $\text{Au}_N$ Clusters

#### 12-Vertex Structures: Icosahedra, Ino-Decahedra and Cuboctahedra.

Figure 1.4 compares  $E_b$  for the high-symmetry  $\text{Au}_N$  structures of the Ih, I-Dh and CO geometries. Similar trends to the results of  $\text{Pd}_N$  are seen with sharply increasing  $E_b$  for  $N < 100$ , levelling out asymptotically towards the bulk  $E_{coh}$  value of 3.81 eV [4] as  $N \rightarrow \infty$ . Parameter set *II* tends to a higher value of  $E_b$  than parameter set *I*, an inverse of the results for  $\text{Pd}_N$  clusters (Figure 1.2). Figure 1.5 shows a plot relating  $E_b$  to the bulk limit ( $N^{-\frac{1}{3}} \rightarrow 0$ ), and this suggests that the parameter set *I* underestimates the extrapolated bulk  $E_{coh}$  value (3.77 eV), whilst parameter set *II* does not (3.81 eV).

Structural preferences are difficult to identify in Figure 1.4; we can calculate relative stabilities ( $\Delta E_b$ ) of different geometries with identical nuclearities using:

$$\Delta E_b = E_{b_{Ih}} - E_{b_x} \quad (1.5)$$

where the binding energies of I-Dh or CO can be directly compared with Ih ( $E_{b_{Ih}}$ ) when substituted in for  $E_{b_x}$ . Positive values indicate reduced stability, and a negative value indicates increased stability, relative to the Ih; thus  $\Delta E_b$  is plotted in Figure 1.6 for  $\text{Au}_N$

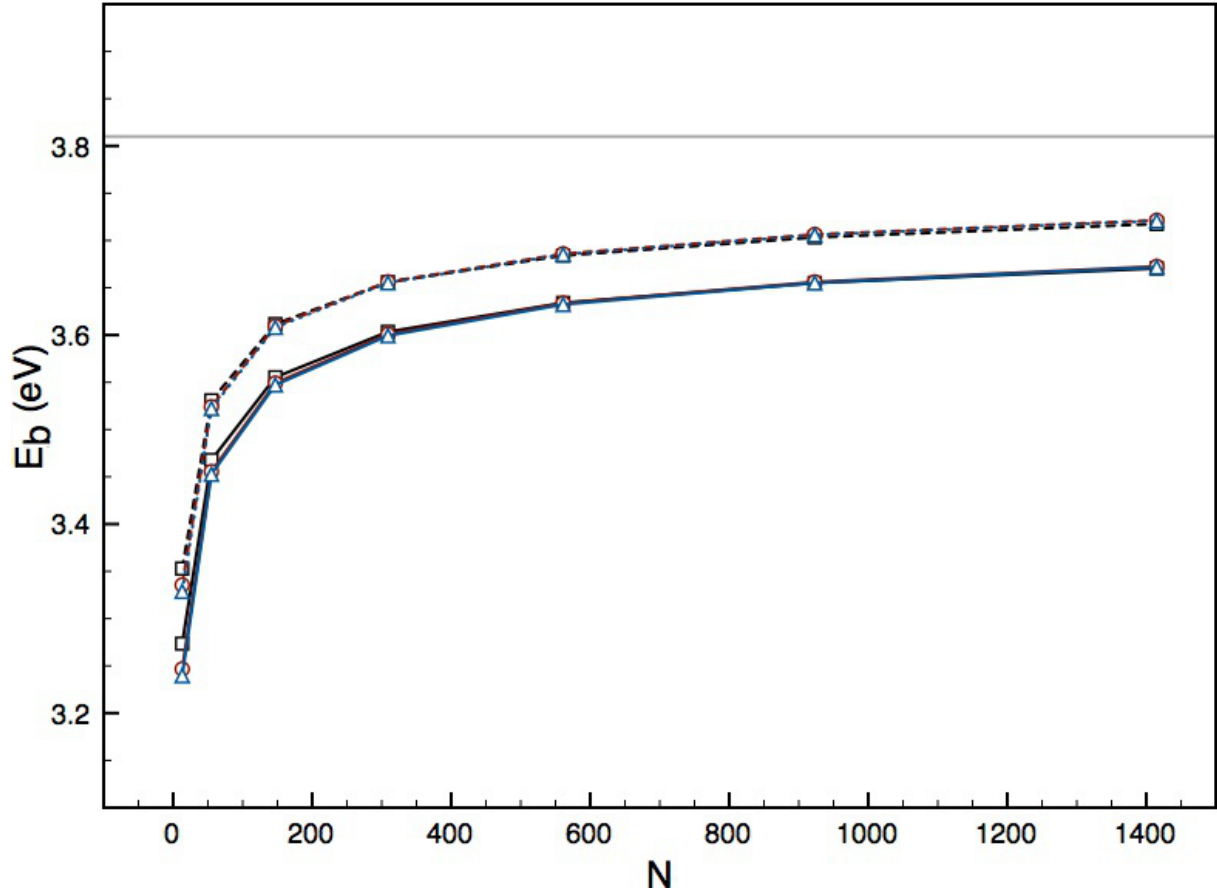

Figure 1.4: Plot of  $E_b$  for  $Au_N$  structures against  $N$ . Solid lines represent the parameter set *I* of Cleri and Rosato [1], and dashed lines represent the parameter set *II* of Baletto *et al.* [2]. Ih (black squares), I-Dh (red circles) and CO (blue triangles) are shown in both plots; the bulk  $E_{coh}$  (3.81 eV [4]) is displayed as a grey solid line.



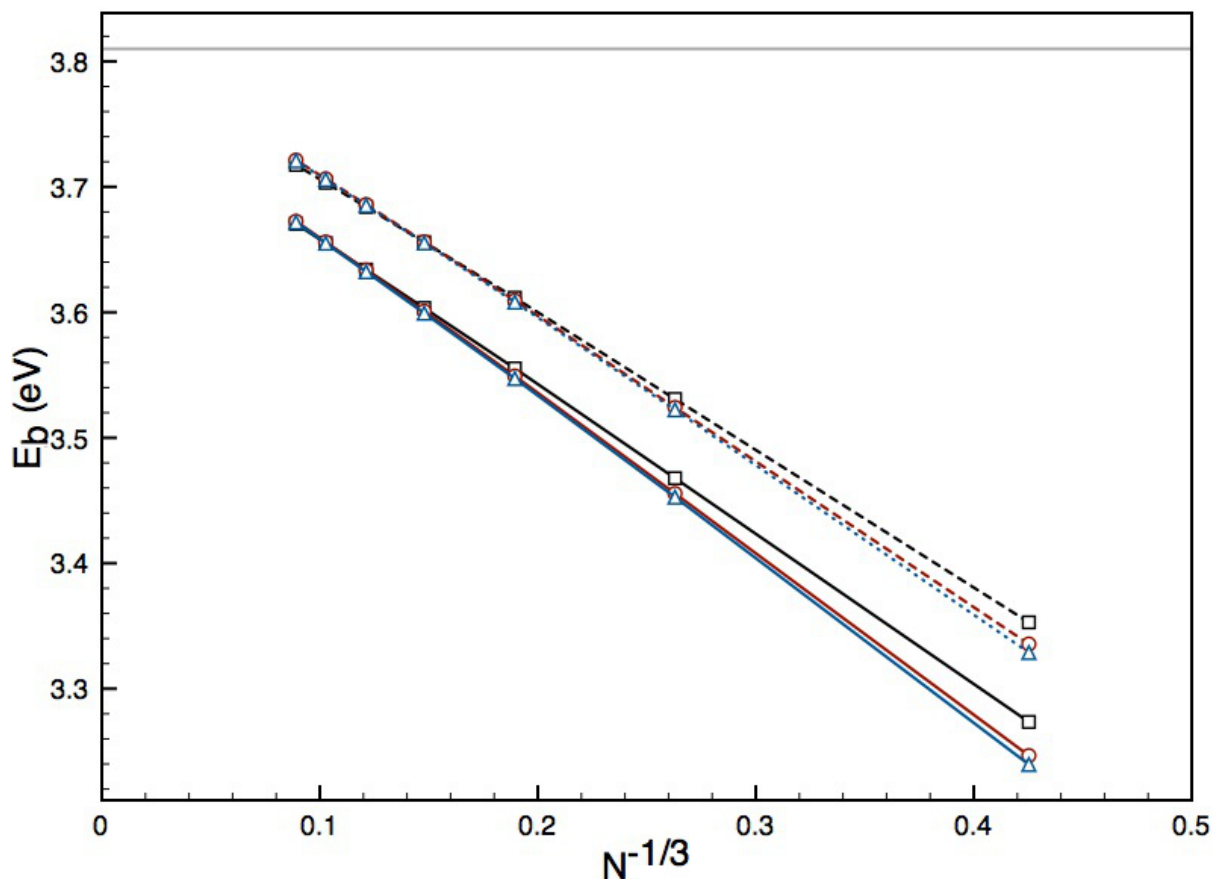

Figure 1.5: Plot of  $E_b$  for  $Au_N$  structures against  $N^{-1/3}$ . Solid lines represent the parameter set *I* of Cleri and Rosato [1], and dashed lines represent the parameter set *II* of Baletto *et al.* [2]. Ih (black squares), I-Dh (red circles) and CO (blue triangles) are shown in both plots; the bulk  $E_{coh}$  (3.81 eV [4]) is displayed as a grey solid line.

clusters.

For parameter set *I* we see intersection of  $E_{b_{Ih}}$  at  $N = 682$  by  $\Delta E_{b_{I-Dh}}$  and at  $N = 923$  by  $\Delta E_{b_{CO}}$ , calculated using a linear fit. For parameter set *II* these intersections of  $E_{b_{Ih}}$  are at lower  $N$ : 284 and 393 for  $\Delta E_{b_{I-Dh}}$  and  $\Delta E_{b_{CO}}$ , respectively. The values of  $N$  for these intersections are much less than found for  $Pd_N$ , implying relative instability of the close-packed cluster geometries (Ih, I-Dh) with respect to the crystalline bulk fragments for Au nanoparticles.

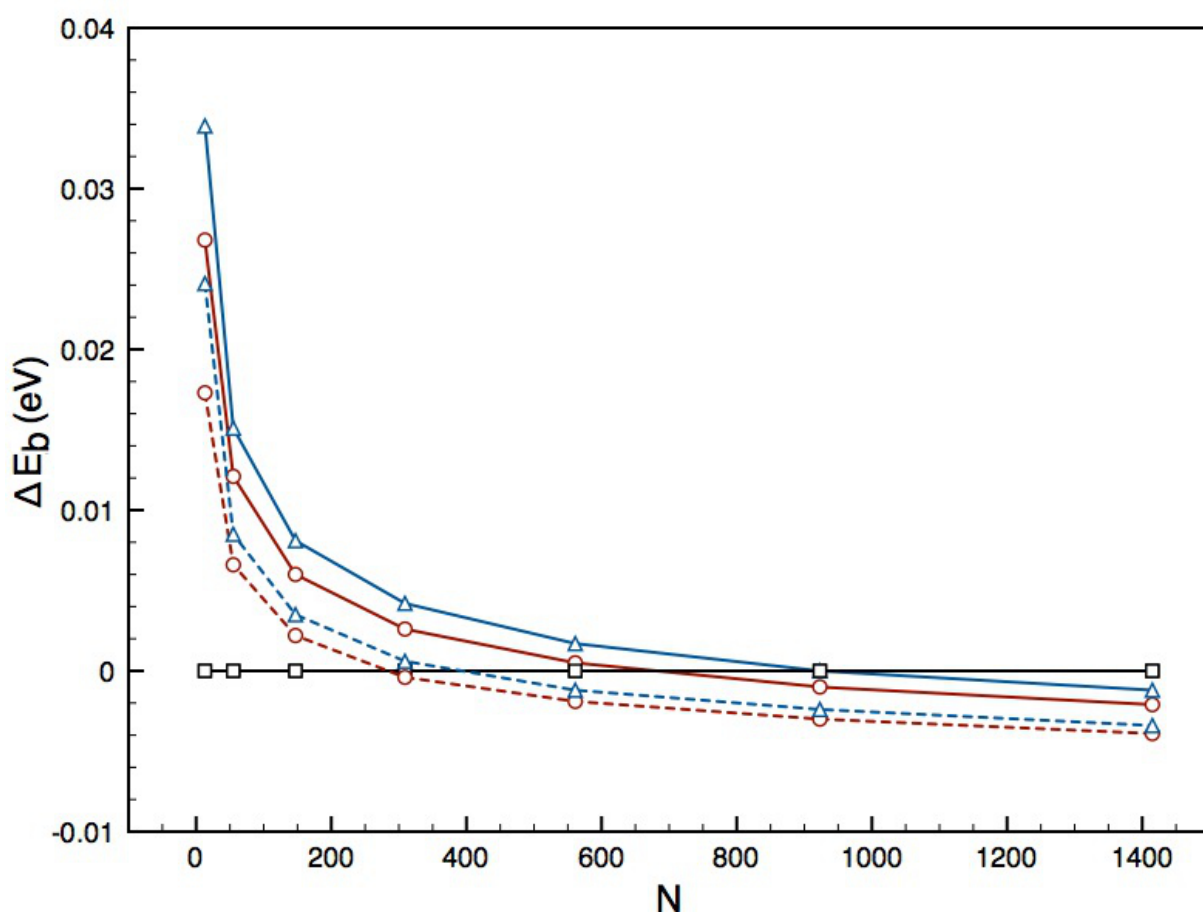

Figure 1.6: Plot of  $\Delta E_b$  for Ih (black), I-Dh (red) and CO (blue)  $Au_N$  structures against  $N$ . Solid lines represent parameter set *I* of Cleri and Rosato [1], and dashed lines represent parameter set *II* of Baletto *et al.* [2].

## LIST OF REFERENCES

- [1] F. Cleri and V. Rosato. Tight-binding potentials for transition metals and alloys. *Phys. Rev. B*, 48(1):22–33, 1993.
- [2] F. Baletto, R. Ferrando, A. Fortunelli, F. Montalenti, and C. Mottet. Crossover among structural motifs in transition and noble-metal clusters. *J. Chem. Phys.*, 116(9):3856–3863, 2002.
- [3] R. Ferrando. *Personal Communication*, 2009.
- [4] C. Kittel. *Introduction To Solid State Physics 6<sup>th</sup> Edition*. Wiley, New York, 1986.
